# Supplementary material
Source: Research Square preprint supplement (doi:10.21203/rs.3.rs-7818277/v1)

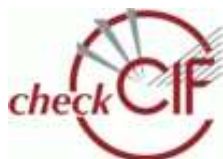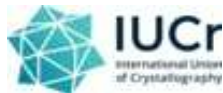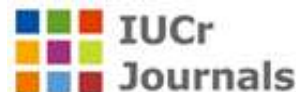

## checkCIF/PLATON report

Structure factors have been supplied for datablock(s) yd\_ms\_bcb\_1930\_0m\_a

THIS REPORT IS FOR GUIDANCE ONLY. IF USED AS PART OF A REVIEW PROCEDURE FOR PUBLICATION, IT SHOULD NOT REPLACE THE EXPERTISE OF AN EXPERIENCED CRYSTALLOGRAPHIC REFEREE.

No syntax errors found.      CIF dictionary      Interpreting this report

### Datablock: yd\_ms\_bcb\_1930\_0m\_a

---

|                        |                           |                                 |                          |
|------------------------|---------------------------|---------------------------------|--------------------------|
| Bond precision:        | C-C = 0.0019 Å            | Wavelength=0.71073              |                          |
| Cell:                  | a=8.2701 (19)<br>alpha=90 | b=12.237 (3)<br>beta=97.872 (8) | c=13.439 (3)<br>gamma=90 |
| Temperature:           | 100 K                     |                                 |                          |
|                        | Calculated                | Reported                        |                          |
| Volume                 | 1347.2 (5)                | 1347.3 (5)                      |                          |
| Space group            | P 21/n                    | P 1 21/n 1                      |                          |
| Hall group             | -P 2yn                    | -P 2yn                          |                          |
| Moiety formula         | C17 H17 N O2              | 4 (C17 H17 N O2)                |                          |
| Sum formula            | C17 H17 N O2              | C68 H68 N4 O8                   |                          |
| Mr                     | 267.32                    | 1069.26                         |                          |
| Dx, g cm <sup>-3</sup> | 1.318                     | 1.318                           |                          |
| Z                      | 4                         | 1                               |                          |
| Mu (mm <sup>-1</sup> ) | 0.086                     | 0.086                           |                          |
| F000                   | 568.0                     | 568.0                           |                          |
| F000'                  | 568.25                    |                                 |                          |
| h, k, lmax             | 11, 16, 18                | 11, 16, 18                      |                          |
| Nref                   | 3520                      | 3459                            |                          |
| Tmin, Tmax             | 0.992, 0.998              | 0.678, 0.746                    |                          |
| Tmin'                  | 0.988                     |                                 |                          |

Correction method= # Reported T Limits: Tmin=0.678 Tmax=0.746  
AbsCorr = MULTI-SCAN

Data completeness= 0.983

Theta(max)= 28.848

R(reflections)= 0.0481( 2784)

wR2(reflections)=  
0.1290( 3459)

S = 1.051

Npar= 190

---

The following ALERTS were generated. Each ALERT has the format

**test-name\_ALERT\_alert-type\_alert-level.**

Click on the hyperlinks for more details of the test.

---

● **Alert level C**

PLAT041\_ALERT\_1\_C Calc. and Reported SumFormula Strings Differ Please Check  
Calc: C17 H17 N O2  
Rep.: C68 H68 N4 O8

PLAT042\_ALERT\_1\_C Calc. and Reported MoietyFormula Strings Differ Please Check  
Calc: C17 H17 N O2  
Rep.: 4(C17 H17 N O2)

PLAT767\_ALERT\_4\_C INS Embedded LIST 6 Instruction Should be LIST 4 Please Check

PLAT911\_ALERT\_3\_C Missing FCF Refl Between Thmin & STh/L= 0.600 23 Report

|    |   |    |    |   |    |    |   |    |    |   |    |    |   |    |    |   |    |
|----|---|----|----|---|----|----|---|----|----|---|----|----|---|----|----|---|----|
| 0  | 2 | 0, | 1  | 3 | 0, | 0  | 4 | 0, | 1  | 4 | 0, | -3 | 0 | 1, | -3 | 1 | 1, |
| 1  | 3 | 1, | -1 | 4 | 1, | -2 | 5 | 1, | -2 | 1 | 2, | 1  | 1 | 2, | -1 | 2 | 2, |
| -2 | 7 | 2, | 1  | 0 | 3, | 0  | 1 | 3, | 0  | 0 | 4, | 1  | 1 | 4, | -3 | 3 | 4, |
| 0  | 1 | 5, | 2  | 2 | 5, | -1 | 2 | 6, | 1  | 0 | 7, | 0  | 0 | 8, |    |   |    |

---

● **Alert level G**

PLAT045\_ALERT\_1\_G Calculated and Reported Z Differ by a Factor ... 4 Check

PLAT398\_ALERT\_2\_G Deviating C-O-C Angle From 120 for O002 . 105.9 Degree

PLAT720\_ALERT\_4\_G Number of Unusual/Non-Standard Labels ..... 34 Note

|      |      |      |      |      |      |      |      |
|------|------|------|------|------|------|------|------|
| O001 | O002 | N003 | C004 | C005 | H005 | C006 | C007 |
| H00A | H00B | C008 | H00C | H00D | C00A | H00E | C00B |
| H00F | C00C | H00G | C00D | H00H | C00E | C00F | H00I |
| C00G | H00J | C00H | C00I | C00J | H00K | C00K | H00L |
| H00M | H00N |      |      |      |      |      |      |

PLAT793\_ALERT\_4\_G Model has Chirality at C00C (Centro SpGr) S Verify

PLAT910\_ALERT\_3\_G Missing FCF Reflection(s) Below Theta(Min) [Deg]= 2.74 Note

0 1 1,

PLAT912\_ALERT\_4\_G Missing # of FCF Reflections Above STh/L= 0.600 37 Note

PLAT913\_ALERT\_3\_G Missing # of Very Strong Reflections in FCF .... 3 Note

1 0 3, 0 0 4, 1 0 7,

PLAT933\_ALERT\_2\_G Number of HKL-OMIT Records in Embedded .res File 20 Note

|    |   |    |    |   |    |    |   |    |    |   |    |    |   |    |    |   |    |
|----|---|----|----|---|----|----|---|----|----|---|----|----|---|----|----|---|----|
| -3 | 0 | 1, | -3 | 1 | 1, | -3 | 3 | 4, | -2 | 1 | 2, | -2 | 5 | 1, | -2 | 7 | 2, |
| -1 | 2 | 2, | -1 | 2 | 6, | 0  | 0 | 4, | 0  | 1 | 1, | 0  | 1 | 3, | 0  | 1 | 5, |
| 0  | 2 | 0, | 0  | 4 | 0, | 1  | 0 | 3, | 1  | 1 | 2, | 1  | 3 | 0, | 1  | 3 | 1, |
| 1  | 4 | 0, | 2  | 2 | 5, |    |   |    |    |   |    |    |   |    |    |   |    |

PLAT969\_ALERT\_5\_G The 'Henn et al.' R-Factor-gap value ..... 3.369 Note

Predicted wR2: Based on SigI\*\*2 3.83 or SHELX Weight 12.28

PLAT978\_ALERT\_2\_G Number C-C Bonds with Positive Residual Density. 13 Info

---

0 **ALERT level A** = Most likely a serious problem - resolve or explain

0 **ALERT level B** = A potentially serious problem, consider carefully

4 **ALERT level C** = Check. Ensure it is not caused by an omission or oversight

10 **ALERT level G** = General information/check it is not something unexpected

- 3 ALERT type 1 CIF construction/syntax error, inconsistent or missing data
- 3 ALERT type 2 Indicator that the structure model may be wrong or deficient
- 3 ALERT type 3 Indicator that the structure quality may be low
- 4 ALERT type 4 Improvement, methodology, query or suggestion
- 1 ALERT type 5 Informative message, check

It is advisable to attempt to resolve as many as possible of the alerts in all categories. Often the minor alerts point to easily fixed oversights, errors and omissions in your CIF or refinement strategy, so attention to these fine details can be worthwhile. It is up to the individual to critically assess their own results and, if necessary, seek expert advice.

**PLATON version of 04/06/2025; check.def file version of 30/05/2025**

Datablock yd\_ms\_bcb\_1930\_0m\_a - ellipsoid plot

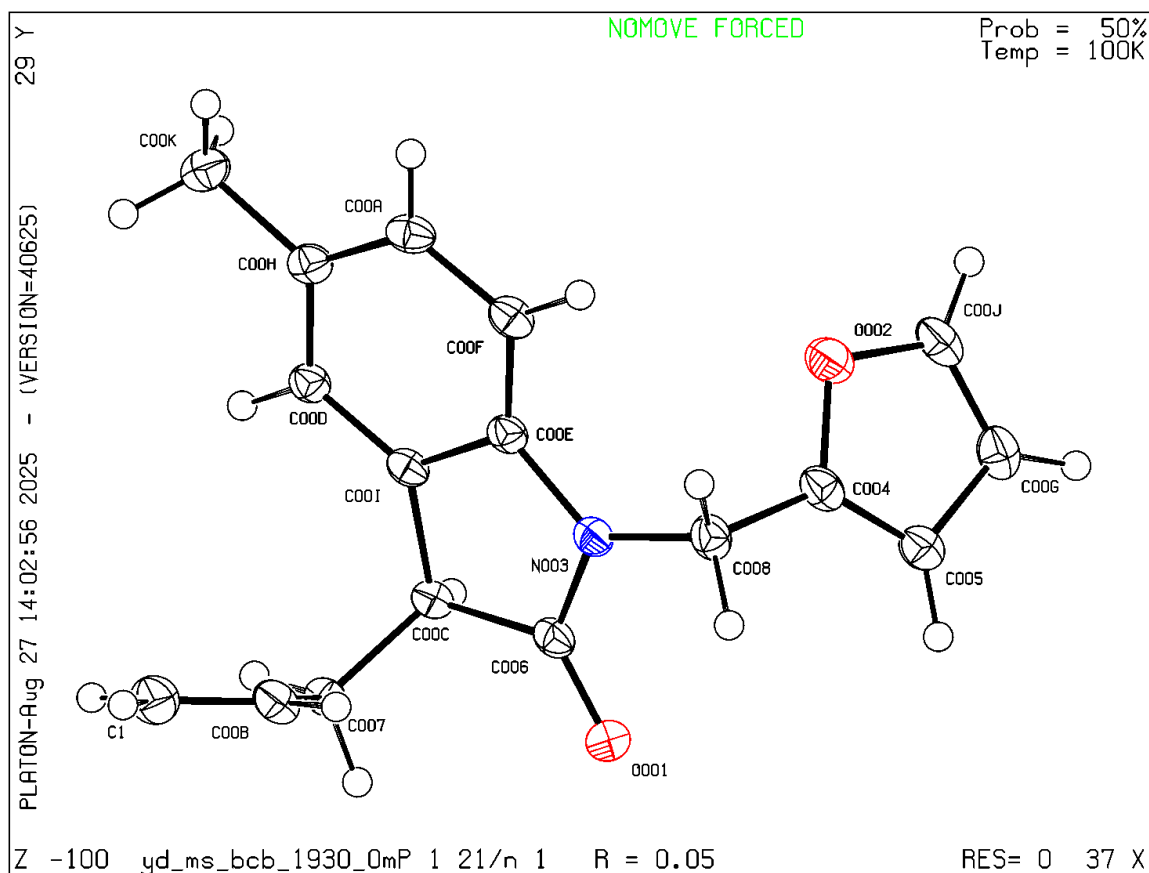

Supplement: Supplementary file 2 [file 1f6b3d9a8aebdf6e1b1897e6.pdf]
